# Supplementary material
Source: ML conference proceedings conference paper supplement (https://openreview.net/forum?id=LcPefbNSwx_)
Supplement: supplementary_material [file attachment]

## A PROOF OF PROPOSITIONS

### A.1 PROOF OF PROPOSITION 1

**Definition 1** A function  $f : D \subset \mathbb{R}^p \mapsto \mathbb{R}$  is called  $L$ -smooth if its gradient  $\dot{f}$  satisfies the Lipschitz continuous condition with the Lipschitz constant  $L$ .

**Lemma 1** (Boyd et al., 2006) If function  $f : D \subset \mathbb{R}^p \mapsto \mathbb{R}$  is  $L$ -smooth, then for  $x, y \in D$ ,

$$|f(x) - f(y) - \langle \dot{f}(y), x - y \rangle| \leq \frac{L}{2} \|x - y\|^2.$$

Here,  $\langle x, y \rangle$  denotes the inner product of two arbitrary vectors  $x, y$  with the same dimension.

**Lemma 2** Assume that the global loss function  $\mathcal{L}_N(\theta) : D \subset \mathbb{R}^p \mapsto \mathbb{R}$  is  $L$ -smooth, convex and has a unique minimum at  $\hat{\theta}$ . Then, for any  $\hat{\theta}^{(t)} \in D, t = 0, 1, \dots, T$ , we have

$$\mathcal{L}_N(\hat{\theta}^{(t)}) - \mathcal{L}_N(\hat{\theta}) \leq \langle \dot{\mathcal{L}}_N(\hat{\theta}^{(t)}), \hat{\theta}^{(t)} - \hat{\theta} \rangle - \frac{1}{2L} \|\dot{\mathcal{L}}_N(\hat{\theta}^{(t)})\|^2.$$

**Proof:** Consider a point  $z = \hat{\theta} + \frac{1}{L} \dot{\mathcal{L}}_N(\hat{\theta}^{(t)})$ . On the one hand, since  $\mathcal{L}_N(\theta)$  is convex,

$$\mathcal{L}_N(\hat{\theta}^{(t)}) - \mathcal{L}_N(z) \leq \langle \dot{\mathcal{L}}_N(\hat{\theta}^{(t)}), \hat{\theta}^{(t)} - z \rangle = \langle \dot{\mathcal{L}}_N(\hat{\theta}^{(t)})\hat{\theta}^{(t)} - \hat{\theta} \rangle + \langle \dot{\mathcal{L}}_N(\hat{\theta}^{(t)}), \hat{\theta} - z \rangle.$$

However, since  $\mathcal{L}_N(\theta)$  is  $L$ -smooth and according to Lemma 1, we have

$$\mathcal{L}_N(z) - \mathcal{L}_N(\hat{\theta}) \leq \langle \dot{\mathcal{L}}_N(\hat{\theta}), z - \hat{\theta} \rangle + \frac{L}{2} \|z - \hat{\theta}\|^2 = \frac{L}{2} \|z - \hat{\theta}\|^2.$$

Then,

$$\begin{aligned} \mathcal{L}_N(\hat{\theta}^{(t)}) - \mathcal{L}_N(\hat{\theta}) &= \mathcal{L}_N(\hat{\theta}^{(t)}) - \mathcal{L}_N(z) + \mathcal{L}_N(z) - \mathcal{L}_N(\hat{\theta}) \\ &\leq \langle \dot{\mathcal{L}}_N(\hat{\theta}^{(t)}), \hat{\theta}^{(t)} - \hat{\theta} \rangle + \langle \dot{\mathcal{L}}_N(\hat{\theta}^{(t)}), \hat{\theta} - z \rangle + \frac{L}{2} \|z - \hat{\theta}\|^2 \\ &= \langle \dot{\mathcal{L}}_N(\hat{\theta}^{(t)}), \hat{\theta}^{(t)} - \hat{\theta} \rangle - \frac{1}{2L} \|\dot{\mathcal{L}}_N(\hat{\theta}^{(t)})\|^2. \end{aligned}$$

Q.E.D

Assume that  $\hat{\theta}^{(t+1)}$  and  $\hat{\theta}^{(t)}$  are solutions after the  $(t+1)$ -th and  $t$ -th iterations, respectively. Then,

$$\begin{aligned} \|\hat{\theta}^{(t+1)} - \hat{\theta}\|^2 &= \|\hat{\theta}^{(t)} - \alpha \dot{\mathcal{L}}_N(\hat{\theta}^{(t)}) - \hat{\theta}\|^2 \\ &= \|\hat{\theta}^{(t)} - \hat{\theta}\|^2 - 2\alpha \langle \dot{\mathcal{L}}_N(\hat{\theta}^{(t)}), \hat{\theta}^{(t)} - \hat{\theta} \rangle + \alpha^2 \|\dot{\mathcal{L}}_N(\hat{\theta}^{(t)})\|^2. \end{aligned} \quad (1)$$

According to Lemma 2 and note that  $\mathcal{L}_N(\hat{\theta}^{(t)}) \geq \mathcal{L}_N(\hat{\theta})$ , we have

$$0 \leq \mathcal{L}_N(\hat{\theta}^{(t)}) - \mathcal{L}_N(\hat{\theta}) \leq \langle \dot{\mathcal{L}}_N(\hat{\theta}^{(t)}), \hat{\theta}^{(t)} - \hat{\theta} \rangle - \frac{1}{2L} \|\dot{\mathcal{L}}_N(\hat{\theta}^{(t)})\|^2.$$

which implies

$$-\langle \dot{\mathcal{L}}_N(\hat{\theta}^{(t)}), \hat{\theta}^{(t)} - \hat{\theta} \rangle \leq -\frac{1}{2L} \|\dot{\mathcal{L}}_N(\hat{\theta}^{(t)})\|^2.$$

Substituting this inequality into equation (1), we have

$$\|\hat{\theta}^{(t+1)} - \hat{\theta}\|^2 \leq \|\hat{\theta}^{(t)} - \hat{\theta}\|^2 - \alpha \left( \frac{1}{L} - \alpha \right) \|\dot{\mathcal{L}}_N(\hat{\theta}^{(t)})\|^2. \quad (2)$$

Equation (2) gives the convergence condition of the gradient decent algorithm. As long as  $\alpha \leq 1/L$ , we have  $\|\hat{\theta}^{(t+1)} - \hat{\theta}\|^2 \leq \|\hat{\theta}^{(t)} - \hat{\theta}\|^2$ . Note that we only consider the first -order expansion of  $\mathcal{L}_N(\theta)$  at point  $\hat{\theta}$  in the proof of Lemma 2. Then, the Lipschitz constant  $L$  can be substituted by the largest eigenvalue of  $\ddot{\mathcal{L}}_N(\hat{\theta})$ , that is,  $\lambda_1$ . As a result, the convergence condition can be written as  $\alpha \leq 1/\lambda_1$ .

---

## A.2 PROOF OF PROPOSITION 2

On the one hand, we can verify that

$$\mathrm{tr}(\mathrm{cov}(Q_1)) = \mathrm{tr}\left(\frac{B\Sigma_z B^\top}{N}\right) \geq \tau_{\min} \mathrm{tr}\left(\frac{BB^\top}{N}\right) = p\tau_{\min} \mathrm{tr}\left(\frac{BB^\top}{pN}\right) \geq \frac{\tau_{\min}^2 p}{N}.$$

On the other hand, we have

$$\mathrm{tr}(\mathrm{Cov}(Q_2)) = N^{-1} \mathrm{tr}(\Sigma_\epsilon) \leq \frac{p}{N} \tau_{\max}.$$

As a result, we have  $\mathrm{tr}\{\mathrm{cov}(Q_1)\} / \mathrm{tr}\{\mathrm{cov}(Q_2)\} \geq \tau_{\min}^2 / \tau_{\max}$ .

## REFERENCES

Boyd, Vandenberghe, and Foybusovich. Convex optimization. *IEEE Transactions on Automatic Control*, 51(11):1859–1859, 2006.
